# Supplementary material for: Co-expression of CD39 and CD103 identifies tumor-reactive CD8 T cells in human solid tumors
Source: Nat Commun. 2018 Jul 13;9:2724. doi: 10.1038/s41467-018-05072-0 (PMC6045647; doi:10.1038/s41467-018-05072-0)
Supplement: Supplementary file 1 — Supplementary Information [file 41467_2018_5072_MOESM1_ESM.pdf]

**Co-expression of CD39 and CD103 identifies tumor-reactive CD8 T cells in human solid tumors**

Duhen et al.

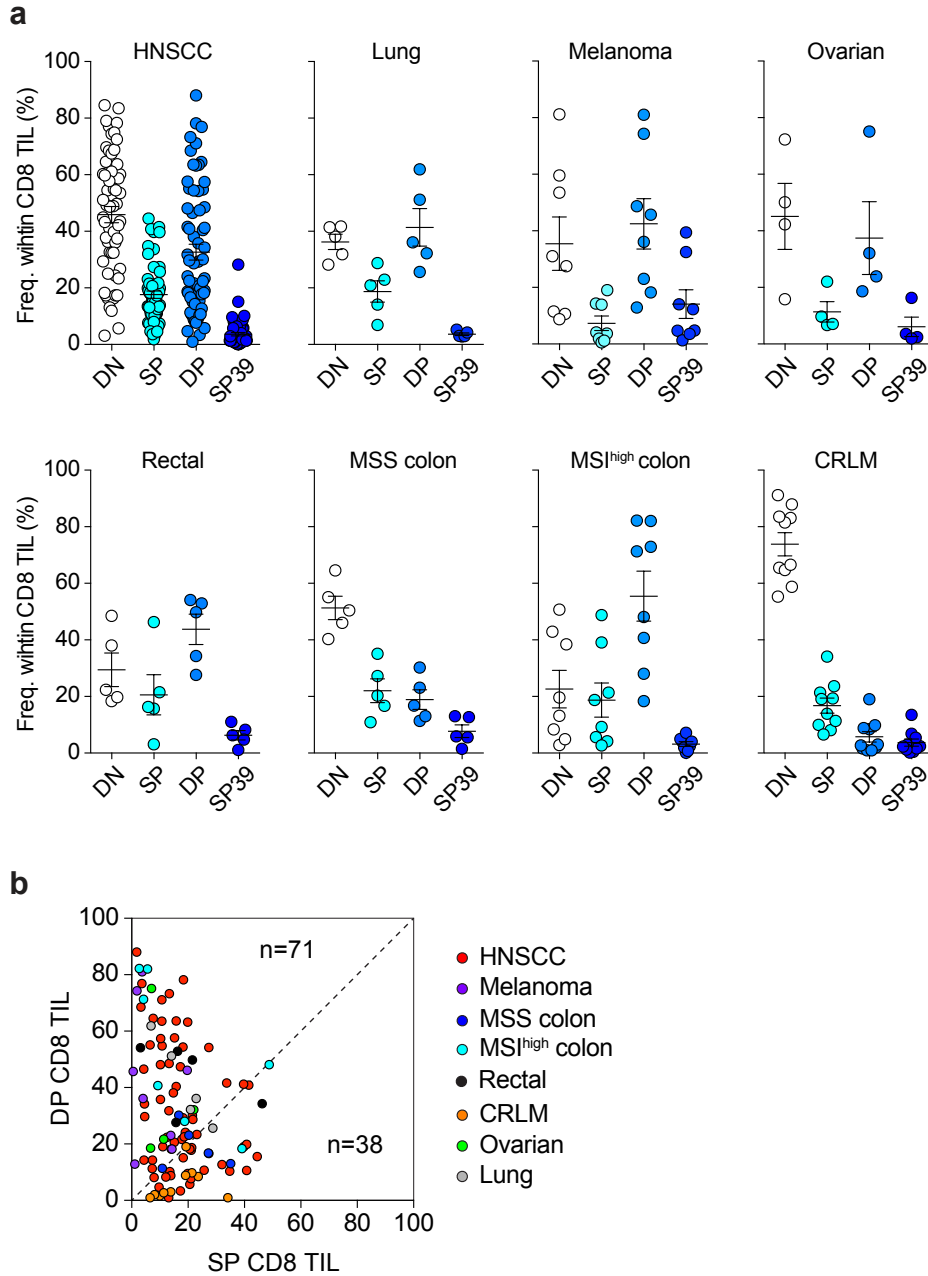

**Supplementary Figure 1. Frequencies of CD8 TIL populations identified by the expression of CD103 and CD39 in different human cancer histologies. (a)** Ex vivo flow cytometric analysis of the expression of CD103 and CD39 on CD8 TILs isolated from patients with HNSCC (n=65), lung cancer (n=5), melanoma (n=8), ovarian cancer (n=4), rectal cancer (n=5), colon cancer (MSS and MSI<sup>high</sup>, n=5 and n=8 respectively) and CRLM (n=10). Combinations of expression of CD103 and CD39 are indicated (DN, SP, DP and SP39). **(b)** Comparison of the frequency of SP CD8 and DP CD8 TILs within each patient across different solid tumors. Each symbol represents one patient and each tumor type is highlighted with a unique color. Small horizontal lines indicate mean  $\pm$ SEM.

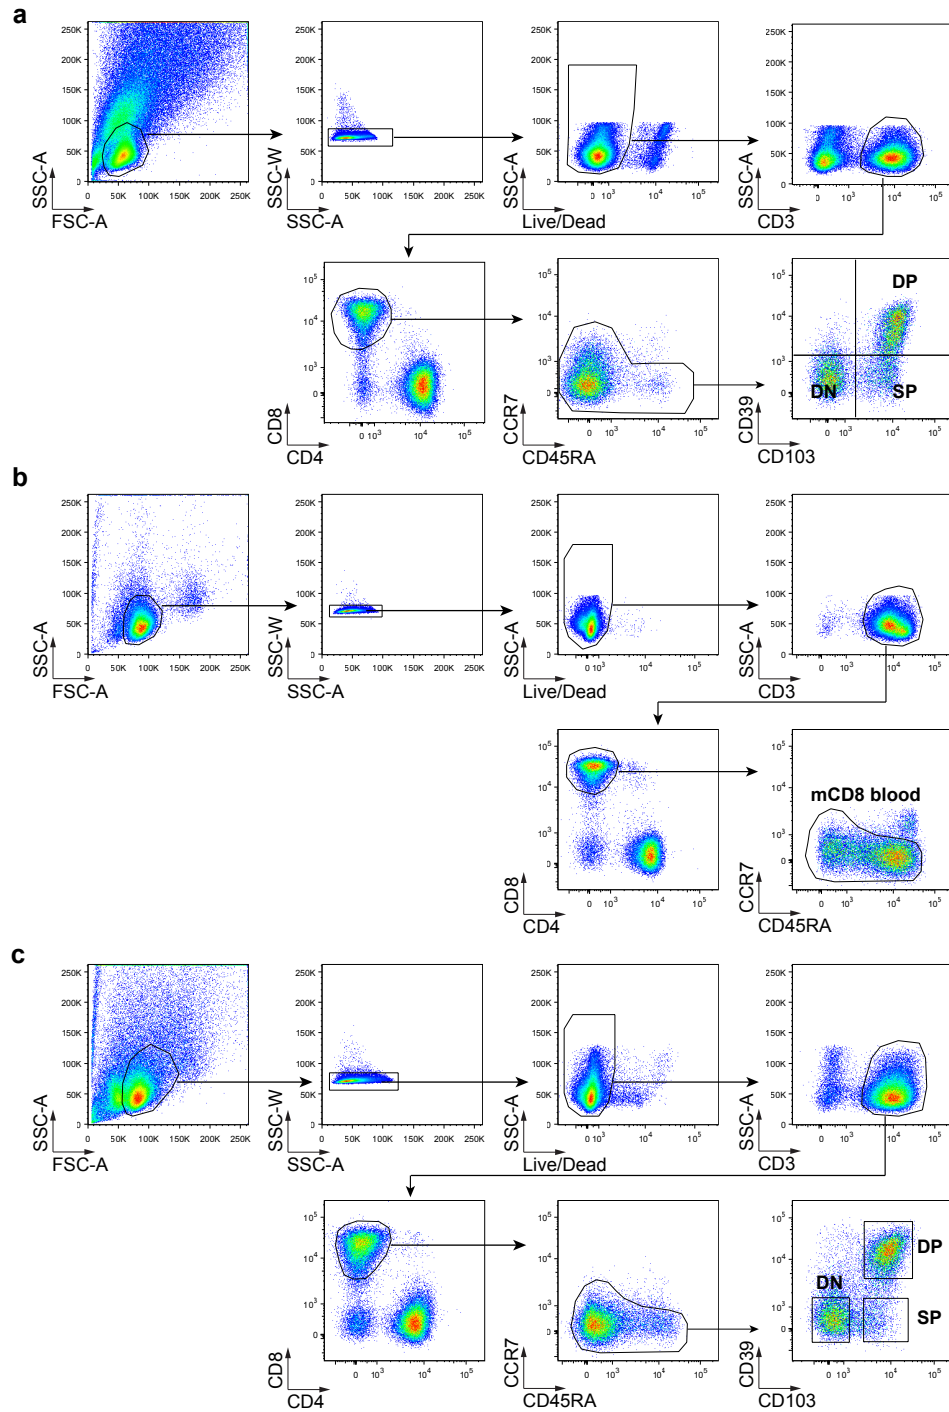

**Supplementary Figure 2. Gating strategies** (a) Gating strategy to analyze the phenotype of CD8 TILs (Fig. 1c-f and Fig. 3a-e). (b) Gating strategy to sort memory CD8 T cells from peripheral blood (mCD8 blood) or normal LN (mCD8 LN) for TCR repertoire analysis (Fig. 5a and c). (c) Gating strategy to sort DN, SP and DP CD8 T cells from primary tumor or metastatic LN for gene-expression analysis (Fig. 2a-e), TCR repertoire analysis (Fig. 5a-d) and tumor reactivity experiments (Fig. 6a-e).

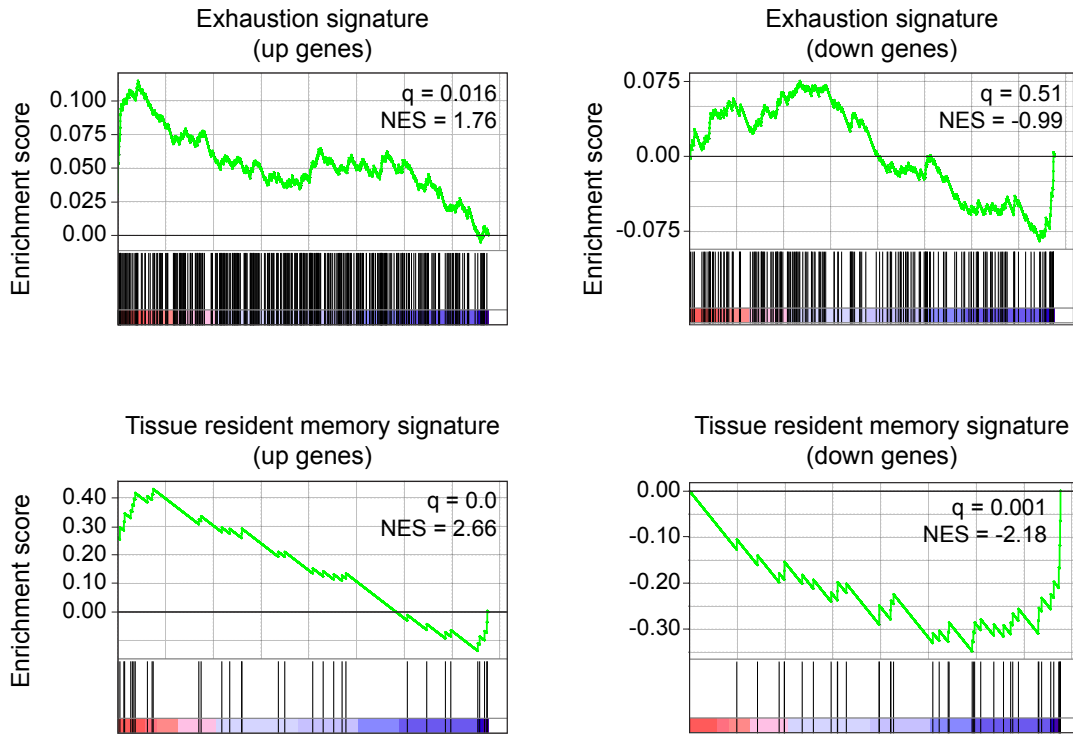

**Supplementary Figure 3. Comparison of the gene expression profile of DP CD8 TILs versus SP CD8 TILs.** Gene Set Enrichment Analysis (GSEA) of the “CD8 T cell exhaustion” and “tissue resident memory T cell” gene sets in the transcriptome of DP CD8 TILs versus that of SP CD8 TILs presented as the normalized enrichment score (NES) for the gene set as the analysis “walks down” the ranked list of genes (reflective of the degree to which the gene set is over-represented at the top or bottom of the ranked list of genes) and the position of the gene set members (black vertical lines).

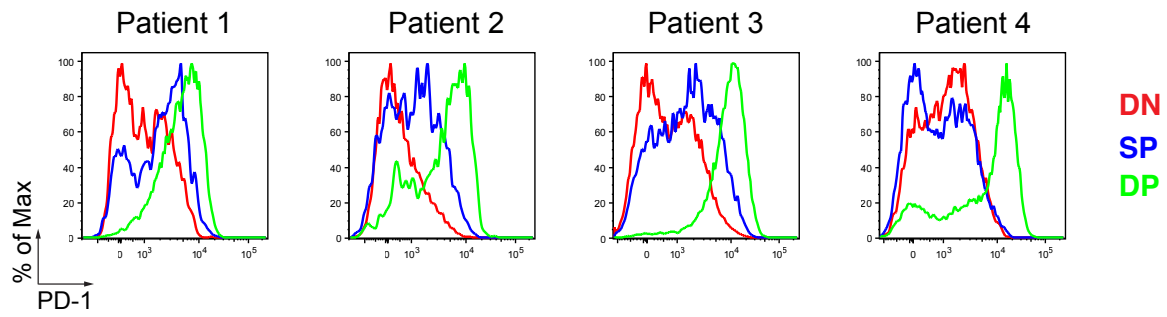

**Supplementary Figure 4. PD-1 expression on DN, SP and DP CD8 TILs.** Ex vivo flow cytometric analysis of the expression of PD-1 on CD8 TILs isolated from 4 different HNSCC patients (colors match key).

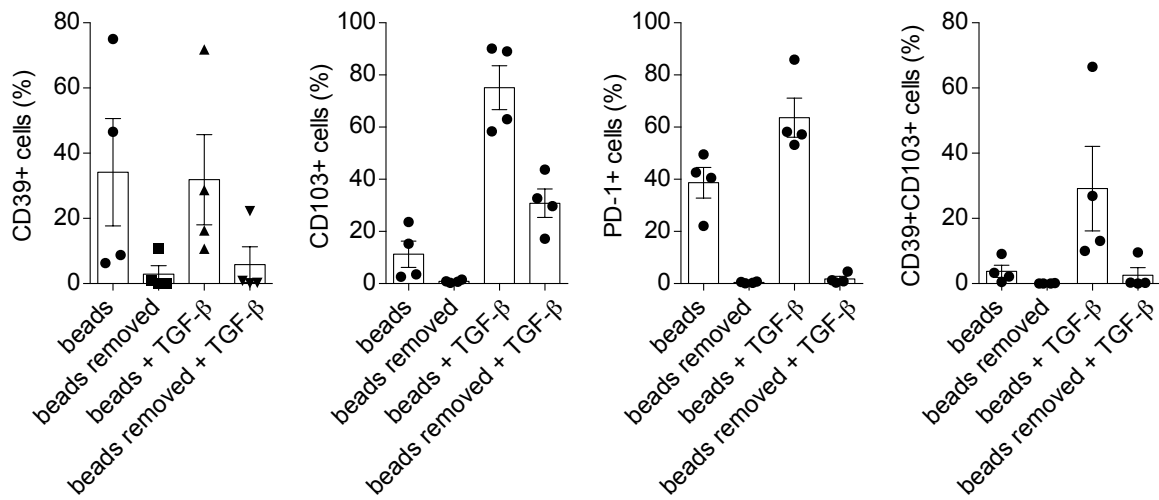

**Supplementary Figure 5. Expression of CD39 and CD103 on CD8 T cells requires sustained stimulation in TGF-β-rich milieu.** CD39, CD103 and PD-1 expression on sorted naïve CD8 T cells from peripheral blood (n = 4). Cells were stimulated with CD3/CD28 coated beads in the presence or absence of TGF-β (2 ng/ml) and expression of CD39, CD103 and PD-1 was analyzed by flow cytometry at day 9. When indicated the beads were removed after 24h of culture. Small horizontal lines indicate mean ± SEM.

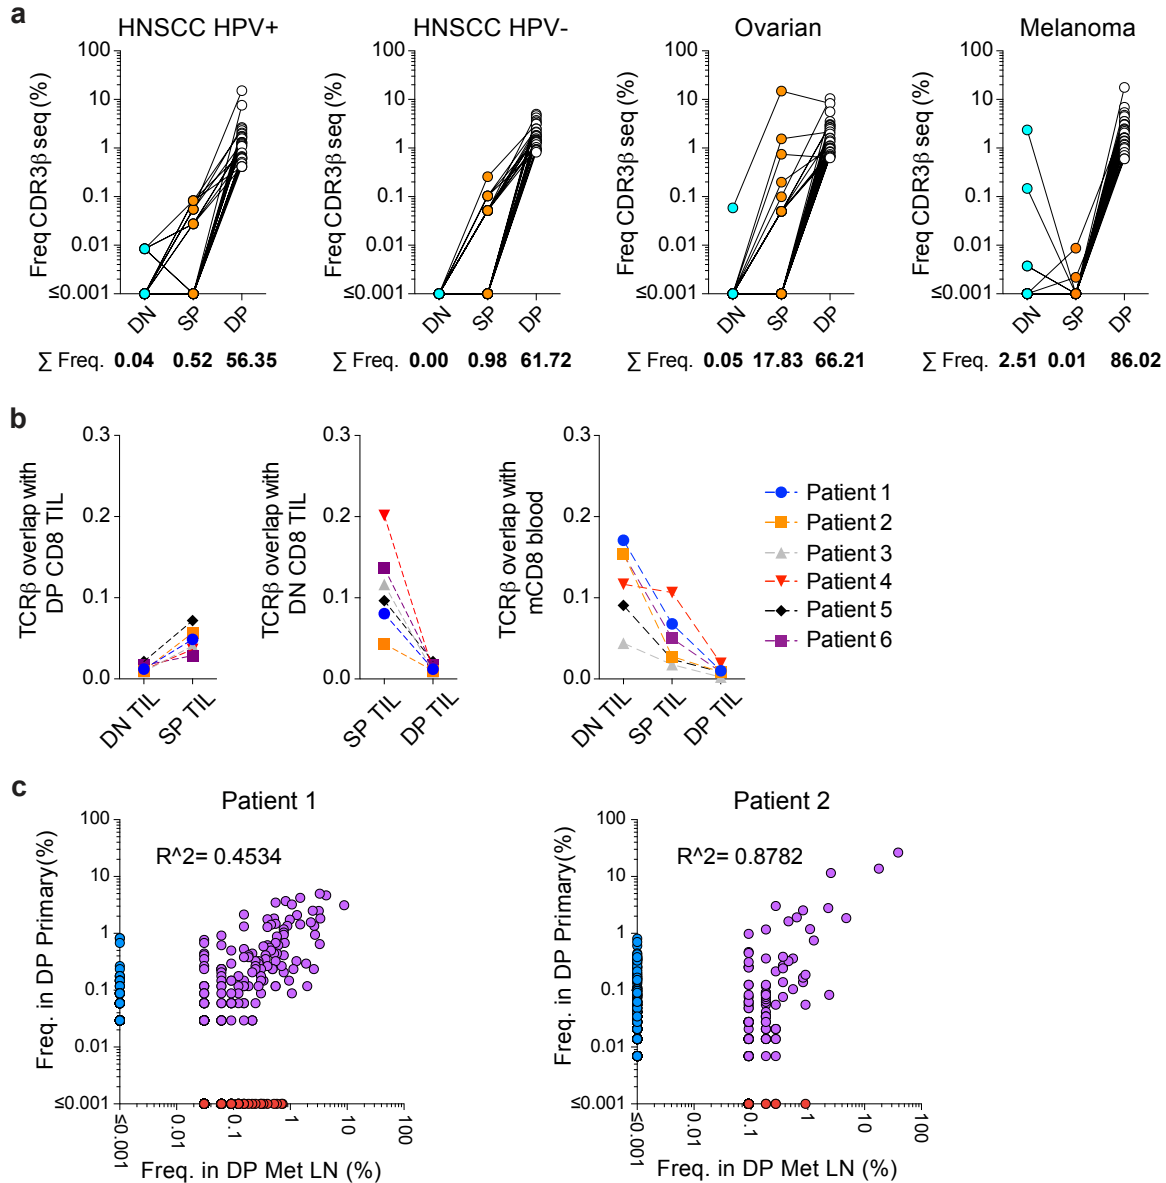

**Supplementary Figure 6. DP CD8 TILs display a distinct TCRβ repertoire.**

(a) Frequency of the 30 most frequent clonotypes in the DP CD8 TILs in a HPV+ HNSCC, a HPV- HNSCC, an ovarian tumor and a melanoma tumor. Their frequency in the DN, SP and DP CD8 TILs is represented. Each dot represents 1 unique TCRβ clonotype. Cumulative frequencies ( $\Sigma$  Freq.) of the clonotypes in each of the populations are shown below. (b) Similarity between the TCR repertoires of CD8 T cell subsets was measured using the Jaccard index on 6 cancer patients. (c) The 500 most frequent CD8 TIL clonotypes are plotted based on their frequency in DP CD8 TILs in the primary tumor and in a metastatic LN in 2 HNSCC patients. Each dot represents 1 unique TCRβ clonotype. Dots on the axis indicate the clonotypes detected within a single repertoire; purple dots indicate clonotypes shared between the two CD8 T cell populations. The Pearson correlation coefficient ( $R^2$ ) was calculated by GraphPad Prism 6.

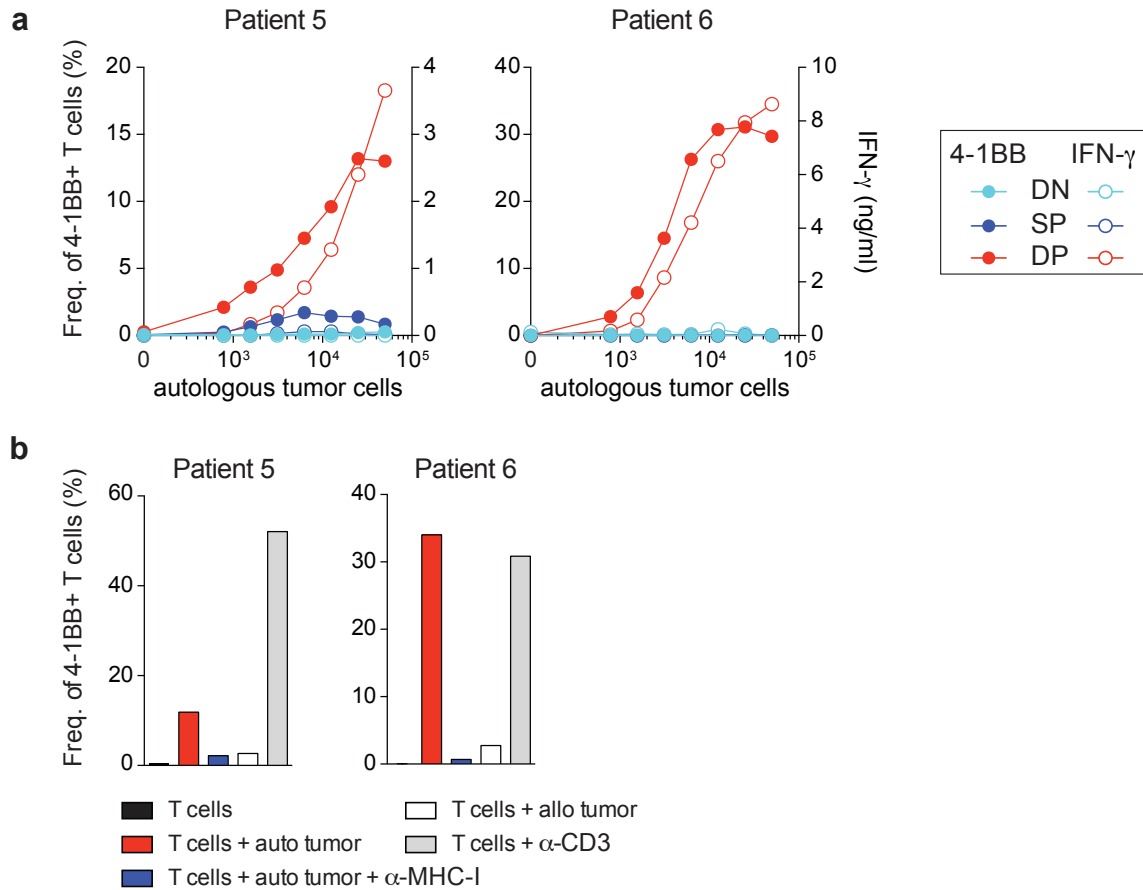

**Supplementary Figure 7. 4-1BB expression and IFN- $\gamma$  secretion by expanded CD8 T cell subsets in response to tumor cells.** DN, SP and DP CD8 TILs were sorted from tumor digest and expanded in vitro. **(a)** Expanded CD8 TILs were tested for tumor reactivity by cultivating them for 20h with increasing numbers of autologous tumor cells, and tumor recognition was assessed by measuring the frequency of 4-1BB expression (filled symbols) and IFN- $\gamma$  secretion (open symbols). Results are shown for two HNSCC patients. **(b)** Reactivity of DP CD8 TILs was confirmed by culture with autologous tumor cells with and without MHC-I blocking antibody, allogeneic tumor cells, and plate-bound anti-CD3. The up-regulation of 4-1BB after 20h is shown for two HNSCC patients.

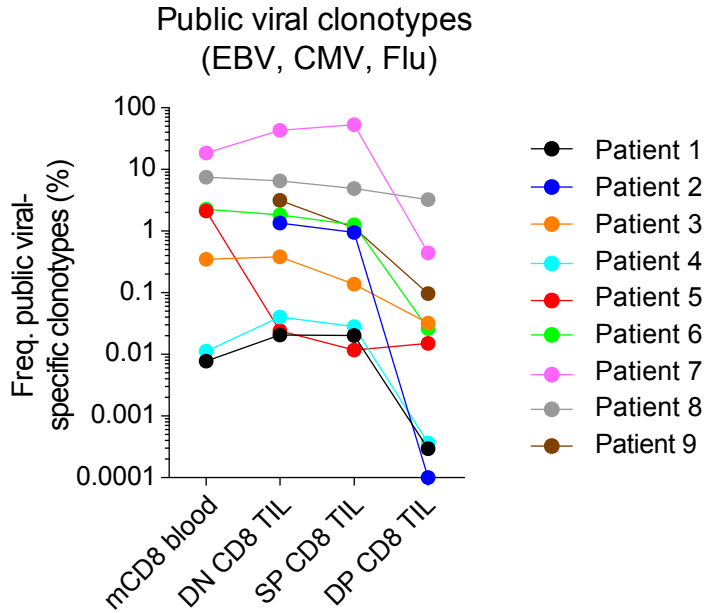

**Supplementary Figure 8. Frequency of public viral-specific clonotypes in CD8 TIL subsets.** The TCR $\beta$  repertoires of memory CD8 T cells isolated from the blood (mCD8 blood) and DN, SP and DP CD8 T cells isolated from the tumor were queried against public TCR sequences specific for EBV, CMV and Flu virus hosted by the VDJ database (Shugay M et al. VDJdb: a curated database of T-cell receptor sequences with known antigen specificity. Nucleic Acids Research 2017, gkx760). The combined frequency of TCR clonotypes specific for those viruses present in the indicated cell type is represented in the graph. Nine patients were analyzed and each patient is represented by a unique color. For patient 2 and 9 no blood sample was obtained.

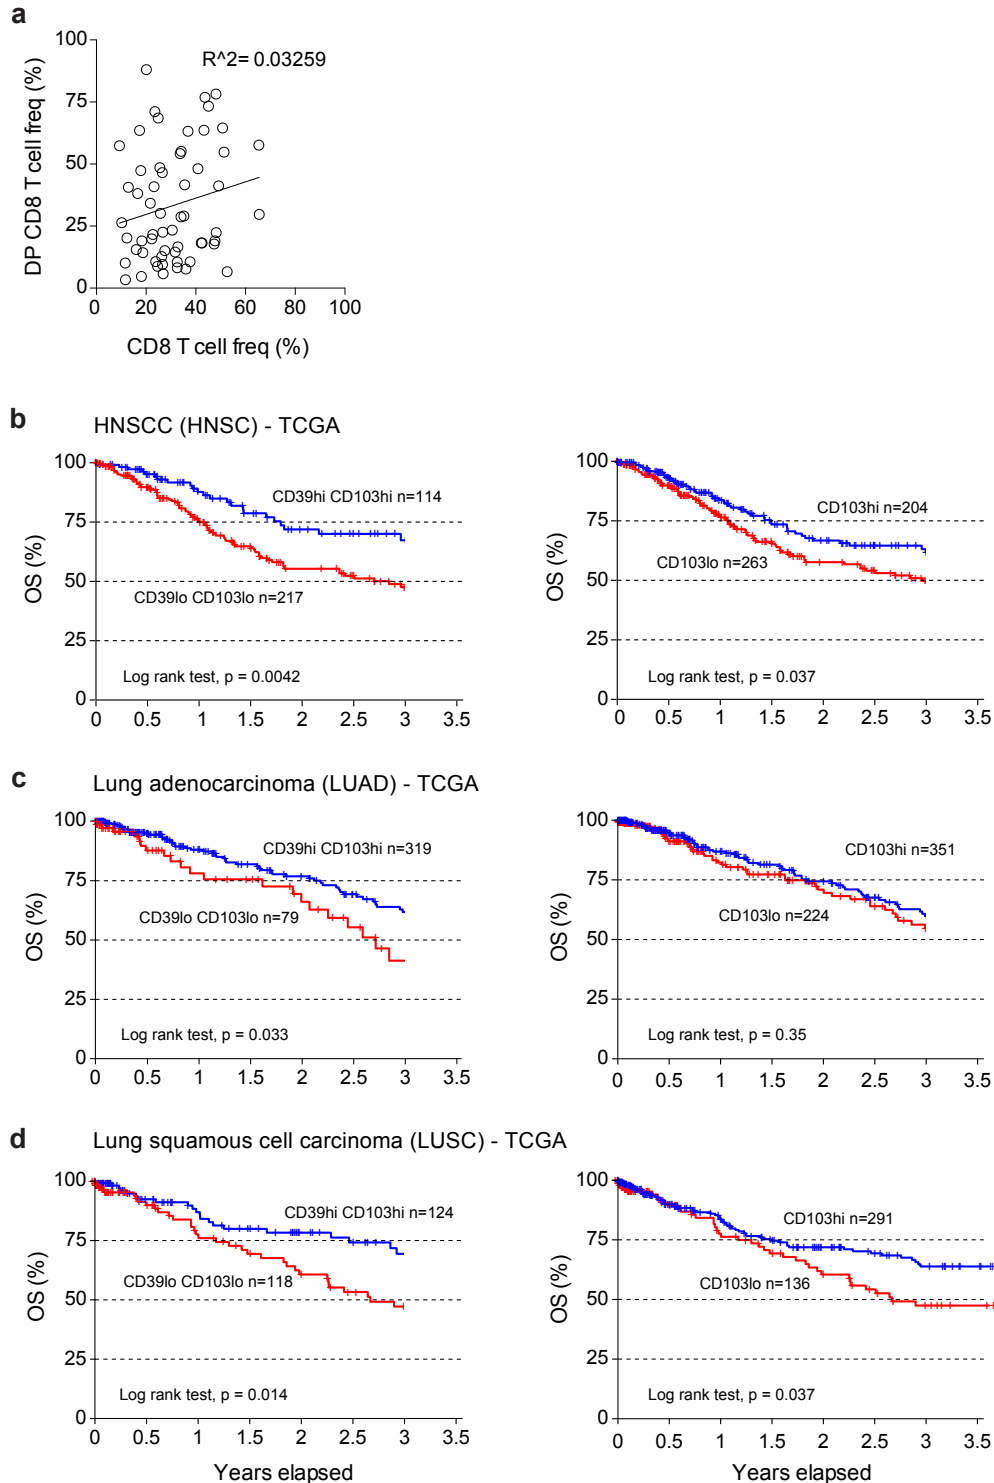

**Supplementary Figure 9. Frequency of DP CD8 TILs and cancer patient survival.**

(a) Correlation between the frequency of CD8 T cells among total T cells and the frequency of DP CD8 cells among total CD8 TILs (HNSCC,  $n=59$ ). (b) Survival of patients with HNSCC (HNSC) from the TCGA dataset, classified on the basis of expression of *ENTPD1* and *ITGAE* transcripts into CD39hi CD103hi tumors or CD39lo

CD103lo tumors or CD103hi tumors and CD103lo tumors. **(c)** Similar analysis performed on patients with lung adenocarcinoma (LUAD) from the TCGA dataset. **(d)** Similar analysis performed on patients with lung squamous cell carcinoma (LUSC) from the TCGA dataset. The Pearson correlation coefficient ( $R^2$ ) was calculated by GraphPad Prism 6 **(a)**. The log-rank test was used to compare survival curves and  $p$ -values less than 0.05 were considered significant **(b, c and d)**.

**Supplementary Table 1.** List of the top 100 genes that contribute the most to PC1 of the PCA plot. The weight of each gene is indicated in the table below.

| Gene         | Weight | Gene     | Weight |
|--------------|--------|----------|--------|
| POU2AF1      | 3.989  | STMN1    | 2.773  |
| CXCL13       | 3.925  | SLC43A3  | 2.686  |
| LOC100509764 | 3.883  | SMC2     | 2.681  |
| MYO7A        | 3.842  | POLQ     | 2.645  |
| C11orf75     | 3.780  | BIRC5    | 2.625  |
| HIST1H1B     | 3.756  | GALNT2   | 2.613  |
| CTLA4        | 3.750  | VDR      | 2.613  |
| NCRNA00158   | 3.747  | CHAF1A   | 2.605  |
| TNFRSF9      | 3.726  | PAQR4    | 2.601  |
| ENTPD1       | 3.724  | FAM3C    | 2.549  |
| GZMB         | 3.714  | TNFSF4   | 2.505  |
| NHS          | 3.714  | CCDC50   | 2.474  |
| ITGAE        | 3.676  | UHRF1    | 2.461  |
| HMOX1        | 3.650  | BCL2L11  | 2.459  |
| KRT81        | 3.630  | LMCD1    | 2.435  |
| TYMS         | 3.622  | C12orf48 | 2.368  |
| CHST12       | 3.618  | TCF7     | -2.333 |
| PHEX         | 3.578  | PLAC8    | -2.344 |
| MKI67        | 3.558  | PZP      | -2.351 |
| HAVCR2       | 3.557  | FAM65B   | -2.354 |
| HIST2H2AB    | 3.550  | SPOCK2   | -2.357 |
| ASPM         | 3.504  | SLC44A1  | -2.366 |
| LAYN         | 3.496  | C19orf22 | -2.379 |
| ADCY3        | 3.491  | PIK3R1   | -2.388 |
| KIF23        | 3.482  | MYBL1    | -2.398 |
| ASF1B        | 3.463  | P2RY8    | -2.454 |
| AKAP5        | 3.458  | BEX5     | -2.456 |
| MGC29506     | 3.444  | YPEL5    | -2.462 |
| HIST1H3G     | 3.439  | BACH2    | -2.462 |
| HIST1H4L     | 3.435  | ZNF204P  | -2.518 |
| KIR2DL4      | 3.429  | MGAT4A   | -2.524 |
| NR5A2        | 3.416  | IL7R     | -2.540 |
| NAB1         | 3.415  | CCR4     | -2.557 |
| HIST1H2AI    | 3.380  | A2M      | -2.570 |
| SIRPG        | 3.339  | S1PR5    | -2.573 |
| UBE2C        | 3.335  | LGR6     | -2.597 |
| LOC652797    | 3.320  | EPHA4    | -2.611 |
| RBPJ         | 3.289  | PDCD4    | -2.624 |
| RAD51AP1     | 3.279  | LDLRAP1  | -2.659 |
| CRIM1        | 3.262  | SLC26A11 | -2.659 |
| AFAP1L2      | 3.250  | S1PR1    | -2.662 |
| FAM111B      | 3.205  | KLF3     | -2.663 |
| GPR56        | 3.190  | PTPRM    | -2.672 |
| HECTD2       | 3.146  | IFNGR1   | -2.682 |
| CD200        | 3.102  | KLF2     | -2.701 |
| PTPRN2       | 3.079  | SORL1    | -2.707 |
| NEIL3        | 3.075  | LSR      | -2.715 |
| ETV1         | 3.022  | MYO1D    | -2.715 |
| CHEK1        | 2.914  | CCR7     | -2.732 |
| FABP5        | 2.809  | SELL     | -2.755 |

**Supplementary Table 2.** Patient characteristics for HNSCC patients (n = 62). Fisher exact tests, and F or nonparametric Kruskal-Wallis Rank Sum test were performed for comparing DP low and DP high (cutoff by mean = 32.9%) by categorical, and continuous variables, respectively.

|                      | <b>Total<br/>(N = 62)</b> | <b>DP Low<br/>(N = 36)</b> | <b>DP High<br/>(N = 26)</b> |                |
|----------------------|---------------------------|----------------------------|-----------------------------|----------------|
| <b>Variables</b>     | <b>No (%)</b>             | <b>No (%)</b>              | <b>No (%)</b>               | <b>p-value</b> |
| <b>Age, years</b>    |                           |                            |                             |                |
| Median (Q1, Q3)      | 62.0 (54.3, 69.8)         | 60.5 (53.8, 68.0)          | 65.5 (59.3, 70.8)           | 0.17           |
| Mean (SD)            | 62.5 (12.3)               | 61.1 ( 11.3 )              | 64.3 ( 13.6 )               | 0.32           |
| <b>Gender</b>        |                           |                            |                             | 0.23           |
| Female               | 15 ( 24 )                 | 11 ( 31 )                  | 4 ( 15 )                    |                |
| Male                 | 47 ( 76 )                 | 25 ( 69 )                  | 22 ( 85 )                   |                |
| <b>HPV Status</b>    |                           |                            |                             | 0.21           |
| Negative             | 30 ( 48 )                 | 20 ( 56 )                  | 10 ( 38 )                   |                |
| Positive             | 32 ( 52 )                 | 16 ( 44 )                  | 16 ( 62 )                   |                |
| <b>Primary Site</b>  |                           |                            |                             | 0.53           |
| Hypopharynx          | 3 ( 5 )                   | 2 ( 6 )                    | 1 ( 4 )                     |                |
| Larynx               | 5 ( 8 )                   | 4 ( 11 )                   | 1 ( 4 )                     |                |
| Oral                 | 20 ( 32 )                 | 13 ( 36 )                  | 7 ( 27 )                    |                |
| Oropharynx           | 34 ( 55 )                 | 17 ( 47 )                  | 17 ( 65 )                   |                |
| <b>Smoking</b>       |                           |                            |                             | 0.43           |
| Never                | 23 ( 37 )                 | 15 ( 42 )                  | 8 ( 31 )                    |                |
| Ever                 | 39 ( 63 )                 | 21 ( 58 )                  | 18 ( 69 )                   |                |
| <b>Stage</b>         |                           |                            |                             | 0.02           |
| I-III                | 16 ( 26 )                 | 5 ( 14 )                   | 11 ( 42 )                   |                |
| IV (IVa, IVb or IVc) | 46 ( 74 )                 | 31 ( 86 )                  | 15 ( 58 )                   |                |

**Supplementary Table 3.** Univariate and multivariable OS analysis using Cox-proportional model with Firth's penalized likelihood (n = 62).

| Variables                                 | Univariate Analysis |              |              |         | Multivariable Analysis |              |              |         |
|-------------------------------------------|---------------------|--------------|--------------|---------|------------------------|--------------|--------------|---------|
|                                           | HR                  | 95% Lower CI | 95% Lower CI | p-value | HR                     | 95% Lower CI | 95% Lower CI | p-value |
| <b>DP CD8 (%), cutoff by mean (32.9%)</b> |                     |              |              |         |                        |              |              |         |
| Low                                       |                     |              |              |         |                        |              |              |         |
| High                                      | 0.24                | 0.05         | 0.80         | 0.02    | 0.23                   | 0.04         | 0.96         | 0.04    |
| <b>HPV Status</b>                         |                     |              |              |         |                        |              |              |         |
| Negative                                  |                     |              |              |         |                        |              |              |         |
| Positive                                  | 0.15                | 0.03         | 0.49         | 0.001   | 0.12                   | 0.02         | 0.43         | 0.001   |
| <b>Age at Surgery</b>                     | 1.00                | 0.96         | 1.04         | 0.98    | 0.98                   | 0.94         | 1.02         | 0.37    |
| <b>Gender</b>                             |                     |              |              |         |                        |              |              |         |
| Female                                    |                     |              |              |         |                        |              |              |         |
| Male                                      | 0.63                | 0.23         | 1.93         | 0.40    | 1.48                   | 0.49         | 4.89         | 0.49    |
| <b>Smoking Status</b>                     |                     |              |              |         |                        |              |              |         |
| Never                                     |                     |              |              |         |                        |              |              |         |
| Ever                                      | 1.47                | 0.53         | 4.93         | 0.48    | 1.37                   | 0.46         | 4.78         | 0.58    |
| <b>Stage</b>                              |                     |              |              |         |                        |              |              |         |
| I-III                                     |                     |              |              |         |                        |              |              |         |
| IV (IVa, IVb or IVc)                      | 2.03                | 0.62         | 10.34        | 0.27    | 1.40                   | 0.34         | 8.37         | 0.66    |

**Note: Taking DP CD8 as a continuous variable with log(2) transformed (based on all 62 HNSCC patients):**

Taking DP CD8 as a continuous variable with log (2) transformed [i.e., log(DP CD8, 2)], the univariate analysis shows that there is no significant association of DP CD8 with overall survival [HR (95% CI) = 0.71 (0.47, 1.07), *p*-value = 0.10]. However, Multivariable analysis shows that after controlling for HPV status, age, gender, smoking status and stage, the association of DP CD8 with overall survival [HR (95% CI) = 0.63 (0.38, 1.03)] is almost significant (*p*-value = 0.07).

**Supplementary Table 4.** Univariate and multivariable OS analysis for HPV-negative patients using Cox-proportional model with Firth's penalized likelihood (n = 30).

| Variables                                     | Univariate Analysis |              |              |                 | Multivariable Analysis |              |              |                 |
|-----------------------------------------------|---------------------|--------------|--------------|-----------------|------------------------|--------------|--------------|-----------------|
|                                               | HR                  | 95% Lower CI | 95% Lower CI | <i>p</i> -value | HR                     | 95% Lower CI | 95% Lower CI | <i>p</i> -value |
| <b>DP CD8 (%),<br/>cutoff by mean (32.9%)</b> |                     |              |              |                 |                        |              |              |                 |
| Low                                           |                     |              |              |                 |                        |              |              |                 |
| High                                          | 0.16                | 0.02         | 0.68         | 0.01            | 0.07                   | 0.003        | 0.54         | 0.01            |
| <b>Age at Surgery</b>                         | 0.98                | 0.95         | 1.02         | 0.30            | 0.96                   | 0.90         | 1.00         | 0.07            |
| <b>Gender</b>                                 |                     |              |              |                 |                        |              |              |                 |
| Female                                        |                     |              |              |                 |                        |              |              |                 |
| Male                                          | 1.02                | 0.35         | 3.21         | 0.97            | 1.60                   | 0.50         | 5.64         | 0.43            |
| <b>Smoking Status</b>                         |                     |              |              |                 |                        |              |              |                 |
| Never                                         |                     |              |              |                 |                        |              |              |                 |
| Ever                                          | 2.13                | 0.63         | 10.95        | 0.24            | 3.06                   | 0.78         | 18.88        | 0.12            |
| <b>Stage</b>                                  |                     |              |              |                 |                        |              |              |                 |
| I-III                                         |                     |              |              |                 |                        |              |              |                 |
| IV (IVa, IVb or IVc)                          | 2.08                | 0.61         | 10.74        | 0.26            | 0.93                   | 0.19         | 6.42         | 0.93            |

**Note:** Taking DP CD8 as a continuous variable with log(2) transformed (based on all 30 HNSCC HPV-negative patients):

Taking DP CD8 as a continuous variable with log(2) transformed [i.e., log(DP CD8, 2)], the univariate analysis shows that the hazard of death significantly decreased 48% with 2-fold increase of DP CD8 [HR (95% CI) = 0.52 (0.29, 0.89), *p*-value = 0.02]. Multivariable analysis shows that after controlling for HPV status, age, gender, smoking status and stage, the hazard of death significantly decreased 45% with 2-fold increase of DP CD8 [HR (95% CI) = 0.55 (0.32, 0.95), *p*-value = 0.03].

**Supplementary Table 5.** Estimate OS at 1- year, 2-year and 3-year with 95% confidence interval (CI) by DP Low versus High.

| DP CD8         | # Events/Total | Estimate OS (95% CI) (%) |                |                | <i>p</i> -value* |
|----------------|----------------|--------------------------|----------------|----------------|------------------|
|                |                | 1-year                   | 2-year         | 3-year         |                  |
| <b>DP Low</b>  | 13 / 36        | 74 ( 61, 90 )            | 56 ( 40, 80 )  | 56 ( 40, 80 )  | 0.02             |
| <b>DP High</b> | 2 / 26         | 96 ( 88, 100 )           | 89 ( 75, 100 ) | 89 ( 75, 100 ) |                  |

\*log-rank test

**Supplementary Table 6.** Estimate OS at 1- year, 2-year and 3-year with 95% confidence interval (CI) by DP Low versus High for HPV-negative patients.

| DP CD8         | # Events/Total | Estimate OS (95% CI) (%) |                |                | <i>p</i> -value* |
|----------------|----------------|--------------------------|----------------|----------------|------------------|
|                |                | 1-year                   | 2-year         | 3-year         |                  |
| <b>DP Low</b>  | 12 / 20        | 58 ( 40, 85 )            | 26 ( 10, 71 )  | 26 ( 10, 71 )  | 0.01             |
| <b>DP High</b> | 1 / 10         | 100 ( 100, 100 )         | 86 ( 63, 100 ) | 86 ( 63, 100 ) |                  |

\*log-rank test
